# Supplementary material for: Nanoparticle-induced neutrophil apoptosis increases survival in sepsis and alleviates neurological damage in stroke
Source: PubMed Central journal article supplement — Sci Adv. 2019 Nov 6;5(11):eaax7964. doi: 10.1126/sciadv.aax7964 (PMC6834394; doi:10.1126/sciadv.aax7964), 2019-11-06
Supplement: aax7964_SM.pdf [file aax7964_SM.pdf]

## Supplementary Materials for

### Nanoparticle-induced neutrophil apoptosis increases survival in sepsis and alleviates neurological damage in stroke

Can Yang Zhang, Xinyue Dong, Jin Gao, Wenjing Lin, Ze Liu, Zhenjia Wang\*

\*Corresponding author. Email: zhenjia.wang@wsu.edu

Published 6 November 2019, *Sci. Adv.* **5**, eaax7964 (2019)

DOI: 10.1126/sciadv.aax7964

#### The PDF file includes:

- Fig. S1. Synthetic pathways of DOX-hyd-BSA.
- Fig. S2. <sup>1</sup>H NMR analysis.
- Fig. S3. TEM images of BSA NPs and DOX-ab-BSA NPs.
- Fig. S4. The stability of BSA NPs in serum.
- Fig. S5. Quantitative analysis of cellular uptake of DOX by differentiated HL-60 cells.
- Fig. S6. Flow cytometric analysis on apoptosis of differentiated HL-60 cells 24 hours after treatments with free DOX (0.2 mg/kg), DOX-ab-BSA, or DOX-hyd-BSA NPs (equal to DOX of 0.2 mg/kg), respectively.
- Fig. S7. Flow cytometric analysis of neutrophils in BALF.
- Fig. S8. DOX-hyd-BSA NPs decrease systemic inflammation in the mouse sepsis model.
- Fig. S9. Mouse body weights were monitored following the experiment as shown in Fig. 5M.
- Fig. S10. Toxicity of DOX-conjugated BSA NPs evaluated by histological analysis.

#### Other Supplementary Material for this manuscript includes the following:

(available at [advances.sciencemag.org/cgi/content/full/5/11/eaax7964/DC1](https://advances.sciencemag.org/cgi/content/full/5/11/eaax7964/DC1))

- Movie S1 (.mp4 format). Intravital microscopy of a cremaster venule shows resting neutrophils in circulation.
- Movie S2 (.mp4 format). Intravital microscopy of a cremaster venule shows activated neutrophils in circulation.
- Movie S3 (.mp4 format). Movement of a sham mouse in the cerebral I/R model.
- Movie S4 (.mp4 format). Movement of a mouse with cerebral I/R after PBS treatment.
- Movie S5 (.mp4 format). Movement of a mouse with cerebral I/R after DOX treatment.
- Movie S6 (.mp4 format). Movement of a mouse with cerebral I/R after treatment of DOX-hyd-BSA NPs.

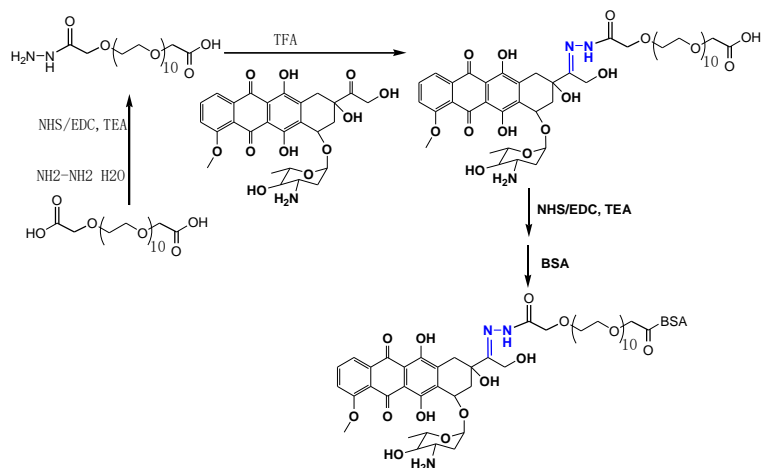

**Fig. S1. Synthetic pathways of DOX-hyd-BSA.**

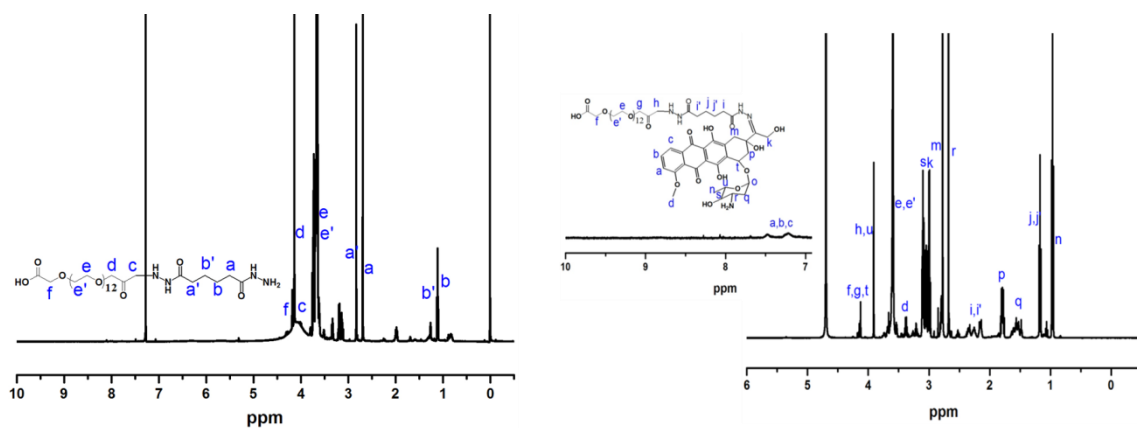

**Fig. S2.  $^1\text{H}$  NMR analysis.**  $^1\text{H}$  NMR spectra of HOOC-PEG-hyd in  $d\text{-CDCl}_3$  (left) and HOOC-PEG-hyd-DOX in  $\text{D}_2\text{O}$  (right).

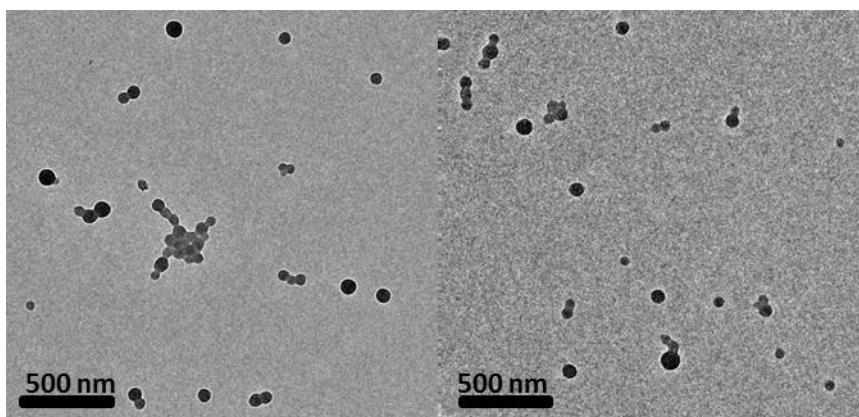

**Fig. S3. TEM images of BSA NPs (left) and DOX-ab-BSA NPs (right).**

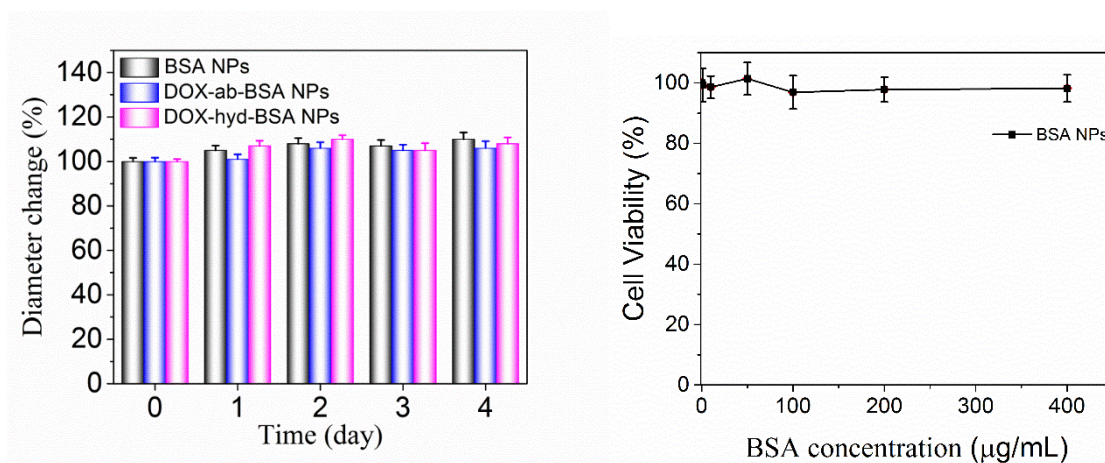

**Fig. S4. The stability of BSA NPs in serum.** Stability of BSA NPs, DOX-ab-BSA NPs, and DOX-hyd-BSA NPs in PBS with 20 % FBS at pH 7.4 (left). Cytotoxicity of BSA NPs to HL60 cells (right). The cells were incubated with BSA NPs for 24 h at different concentrations of NPs. Data are shown as mean  $\pm$  s.d. ( $n = 6$  independent experiments).

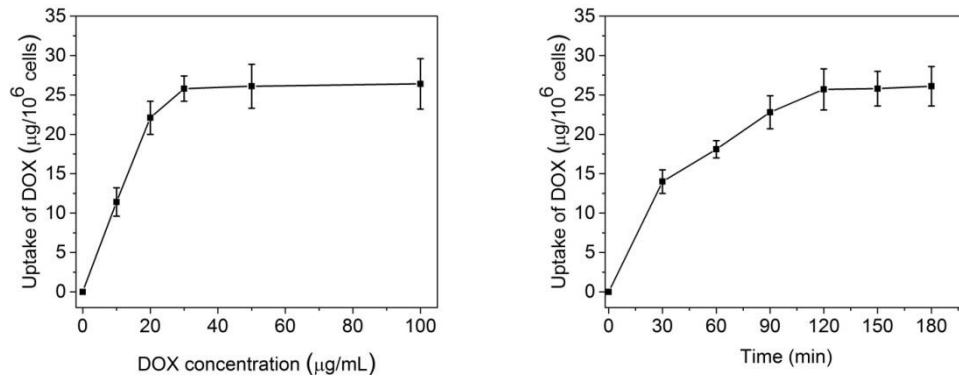

**Fig. S5. Quantitative analysis of cellular uptake of DOX by differentiated HL-60 cells.** Uptake of DOX by differentiated HL-60 cells after they (at  $10^6$  cells/ml) were incubated with DOX-hyd-BSA NPs at different concentrations of DOX for 2 hours (left). Time course of DOX uptake by differentiated HL60 cells after they (at  $10^6$  cells/ml) were incubated with DOX-hyd-BSA NPs (at 30  $\mu\text{g/ml}$  of DOX) (right).

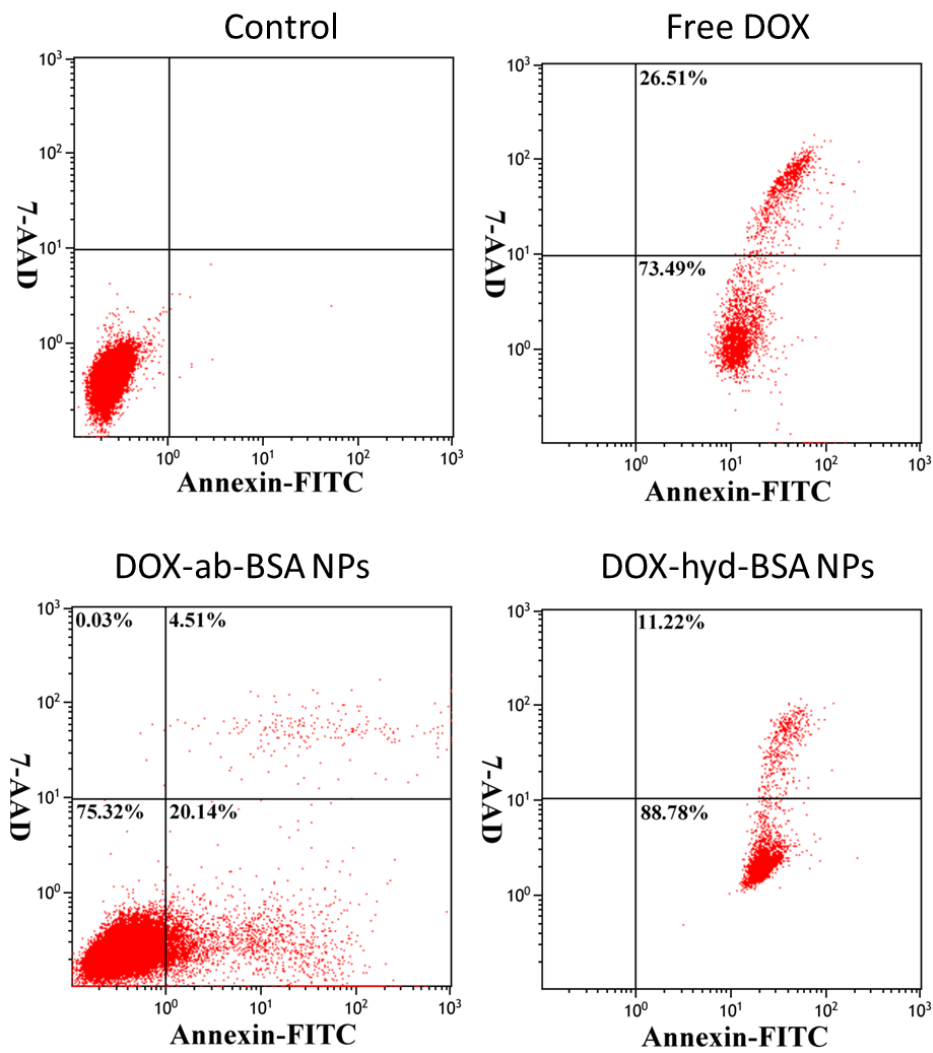

**Fig. S6. Flow cytometric analysis on apoptosis of differentiated HL-60 cells 24 hours after treatments with free DOX (0.2 mg/kg), DOX-ab-BSA, or DOX-hyd-BSA NPs (equal to DOX of 0.2 mg/kg), respectively.**

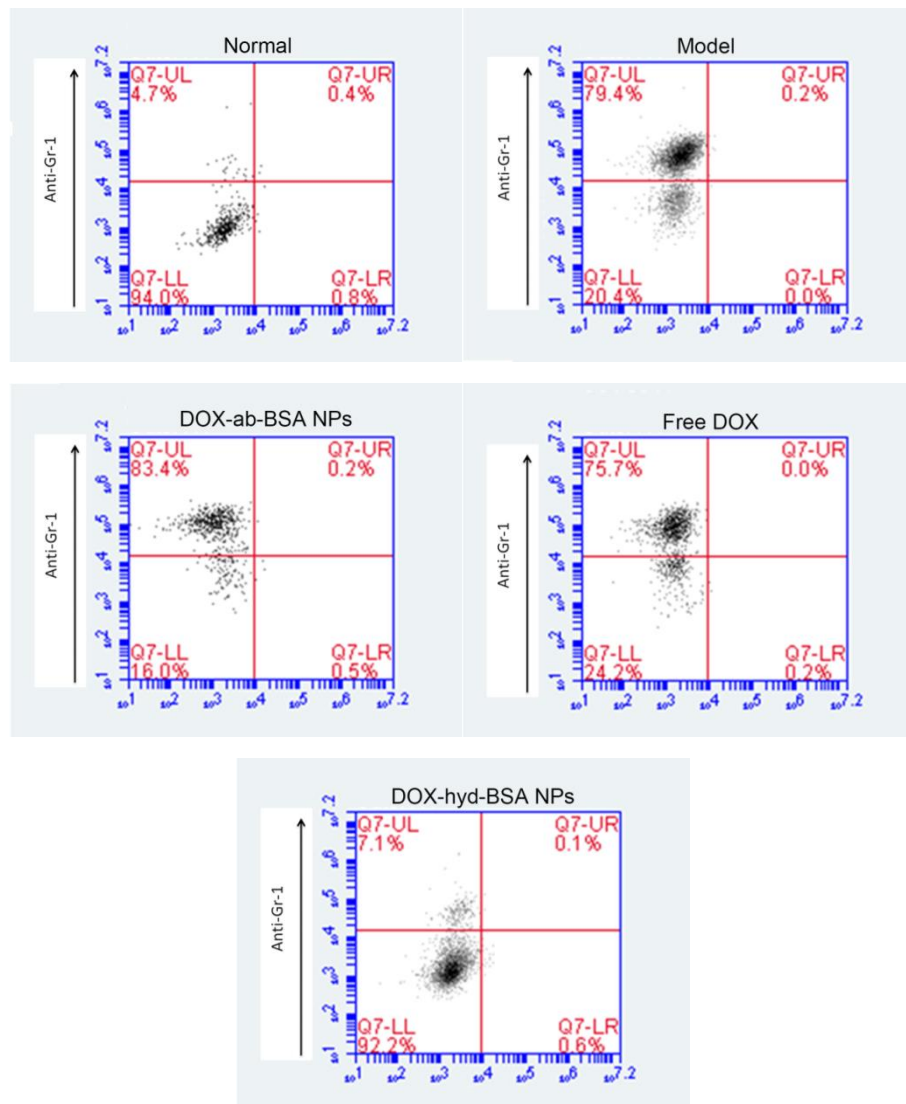

**Fig. S7. Flow cytometric analysis of neutrophils in BALF.** 4 h after *i.t.* LPS challenge (10 mg/kg), PBS, free DOX (0.2 mg/kg), DOX-ab-BSA or DOX-hyd-BSA NPs (DOX at 0.2 mg/kg) were *i.v.* administrated in mice, respectively. BALF was collected 20 h later, and then flow cytometry was performed. Normal represents healthy mice; Model represents LPS-challenged mice; Free DOX represents free DOX treatment; DOX-ab-BSA NPs represents DOX-ab-BSA NPs treatment; DOX-hyd-BSA NPs represents DOX-hyd-BSA NPs treatment. All data expressed as mean  $\pm$  s.d. (3 mice per group).

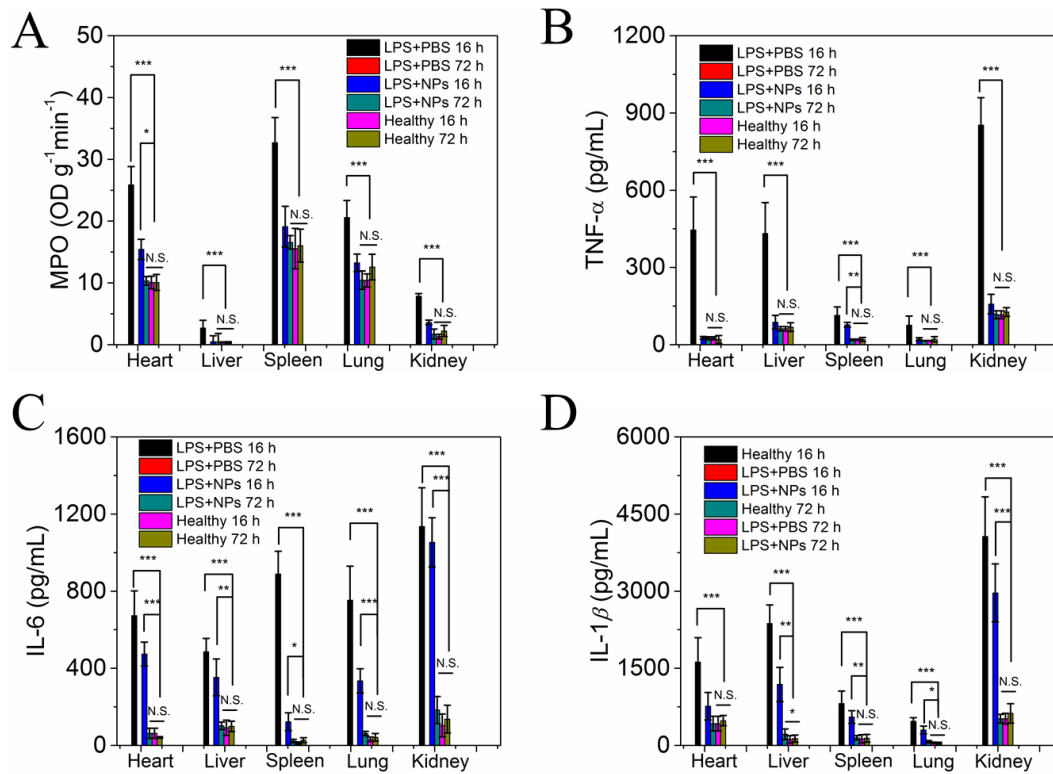

**Fig. S8. DOX-hyd-BSA NPs decrease systemic inflammation in the mouse sepsis model.** 4 h after (*i.p.*) LPS-challenge (50 mg/kg), the mice were treated with PBS or DOX-hyd-BSA NPs. MPO activity (a), TNF- $\alpha$  (b), IL-6 (c) and IL-1 $\beta$  (d) in the major organs were measured at 16 h and 72 h post-LPS challenge. All data expressed as mean  $\pm$  s.d. (5 mice per group at 16 h were used in the experiment, but 4 mice in NPs-treated group were used and all mice in PBS-treated group died at 72 h). Lung tissues were assessed after removal of BALF. \*  $p$  value  $< 0.05$ , \*\*  $p$  value  $< 0.01$ , \*\*\* $p$  value  $< 0.001$ .

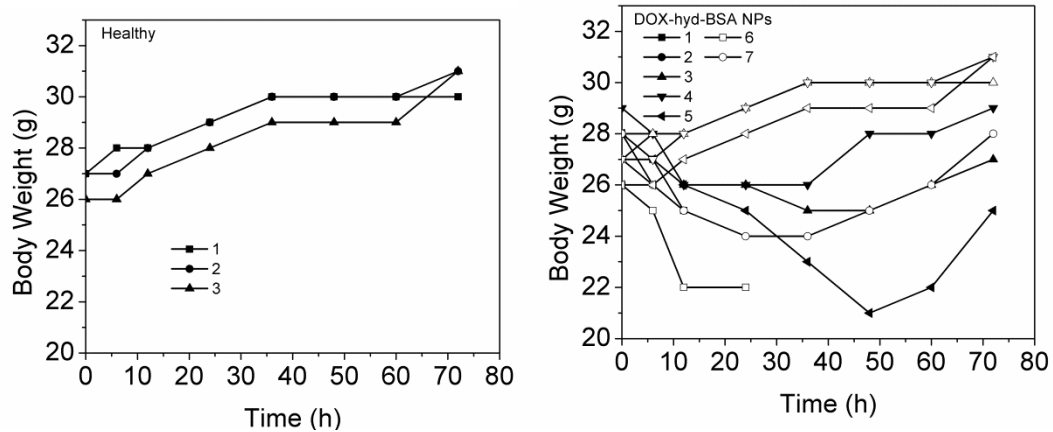

**Fig. S9. Mouse body weights were monitored following the experiment as shown in Fig. 5M. 3**

Mice (left) were the control group (healthy mice) and 7 mice (right) were the DOX-hyd-BSA NPs-treatment group (at 0.2 mg (DOX)/kg).



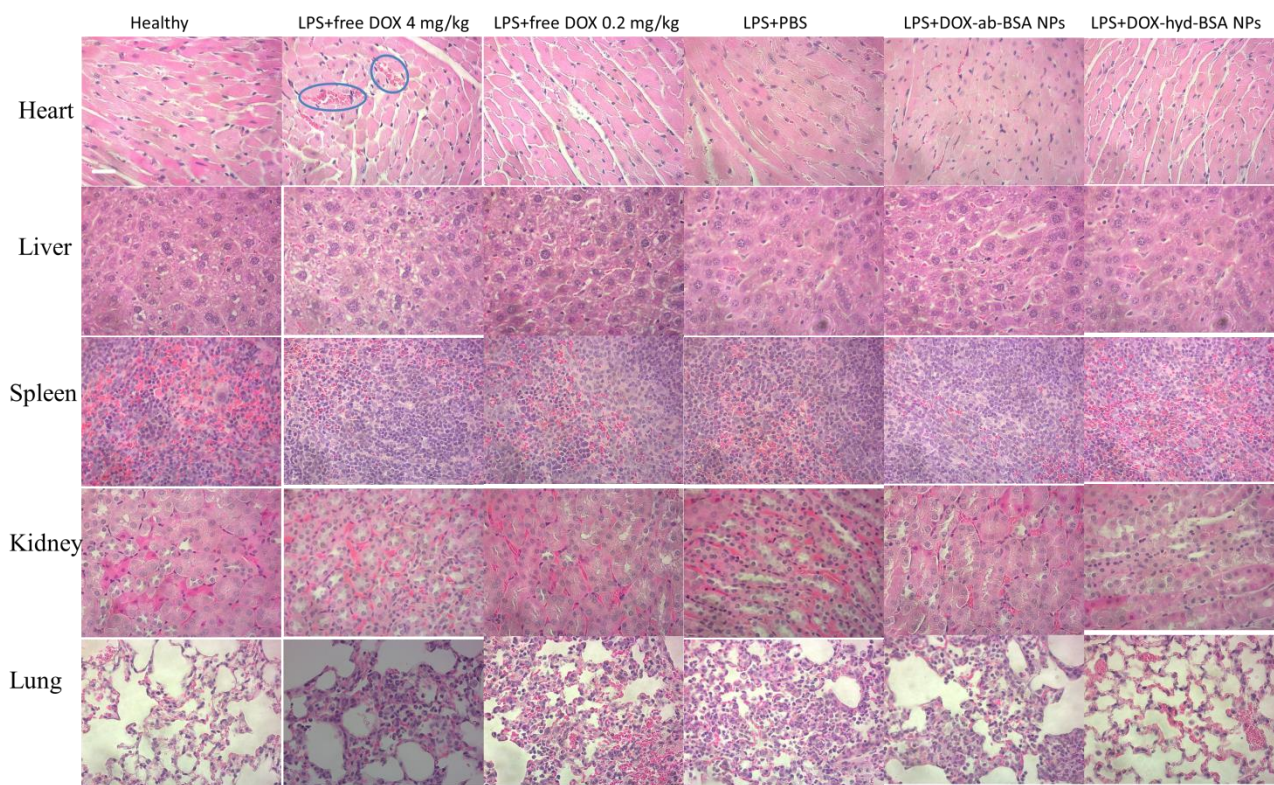

**Fig. S10. Toxicity of DOX-conjugated BSA NPs evaluated by histological analysis.** H&E-stained sections of major organs of healthy and LPS-challenged mice after treatments with PBS, free DOX (4 or 0.2 mg/kg), DOX-ab-BSA NPs, or DOX-hyd-BSA NPs (equal to 0.2 mg/kg at DOX). Scale bar, 20  $\mu$ m. It was observed that DOX-conjugated NPs and free DOX (0.2 mg/kg DOX) did not show any noticeable signs of tissue or cellular damage. In contrast, the high dose of DOX (4.0 mg/kg) induced myocardial damage as shown by vacuolization and myofibril loss highlighted by the circles. Furthermore, the damage of liver, spleen, kidney and lung by DOX in 0.2-4.0 mg/kg was not observed.
